# Supplementary material for: Impact of Prolonged Blood Incubation and Extended Serum Storage at Room Temperature on the Human Serum Metabolome
Source: PubMed Central journal article supplement (PMC5875996; doi:10.3390/metabo8010006), 2018-01-13
Supplement: metabolites-08-00006-s001.pdf [file metabolites-08-00006-s001.pdf]

**Table S1: Impact of preanalytical confounders on human serum metabolite concentrations.** Six analytes with final chemical structure identity pending are not given. Statistical analysis was done via ANOVA models (see Material and Methods). A p-value of < 0.05 and a FDR of < 0.2 was considered as statistically significant.

| Ontology 1  | Ontology 2                  | Metabolite    | Serum storage 24 h, ratio versus control | Blood incubation 6 h, ratio versus control | Serum storage 24 h, p-value versus control | Blood incubation 6 h, p-value versus control | Serum storage 24 h, t-value versus control | Blood incubation 6 h, t-value versus control | Serum storage 24 h, FDR | Blood incubation 6 h, FDR | Sex, ratio male versus female | Sex, p-value male versus female | Sex, t-value male versus female |
|-------------|-----------------------------|---------------|------------------------------------------|--------------------------------------------|--------------------------------------------|----------------------------------------------|--------------------------------------------|----------------------------------------------|-------------------------|---------------------------|-------------------------------|---------------------------------|---------------------------------|
| Amino acids | Amino acids, acidic         | Aspartate     | 3.16                                     | 3.21                                       | 1.31E-32                                   | 8.24E-33                                     | 39.85                                      | 40.35                                        | 2.96E-30                | 1.85E-30                  | 1.08                          | 2.82E-01                        | 1.11                            |
|             | Amino acids, acidic         | Glutamate     | 2.68                                     | 3.72                                       | 1.29E-20                                   | 5.17E-25                                     | 18.52                                      | 24.70                                        | 9.69E-19                | 5.82E-23                  | 1.33                          | 5.68E-03                        | 3.19                            |
|             | Amino acids, aromatic       | Phenylalanine | 1.52                                     | 1.36                                       | 4.91E-23                                   | 2.27E-18                                     | 21.73                                      | 15.89                                        | 5.53E-21                | 7.31E-17                  | 1.10                          | 1.31E-01                        | 1.59                            |
|             | Amino acids, aromatic       | Tyrosine      | 1.06                                     | 1.05                                       | 2.76E-04                                   | 1.34E-03                                     | 4.02                                       | 3.47                                         | 1.88E-03                | 7.56E-03                  | 1.02                          | 8.17E-01                        | 0.24                            |
|             | Amino acids, basic          | Arginine      | 1.28                                     | 0.86                                       | 3.23E-08                                   | 9.82E-05                                     | 6.96                                       | -4.37                                        | 3.47E-07                | 5.97E-04                  | 1.10                          | 4.29E-01                        | 0.81                            |
|             | Amino acids, basic          | Asparagine    | 1.04                                     | 1.19                                       | 2.97E-01                                   | 3.25E-05                                     | 1.06                                       | 4.71                                         | 6.33E-01                | 2.03E-04                  | 1.02                          | 8.42E-01                        | 0.20                            |
|             | Amino acids, basic          | Histidine     | 1.09                                     | 1.14                                       | 4.46E-04                                   | 9.88E-07                                     | 3.85                                       | 5.83                                         | 2.95E-03                | 8.24E-06                  | 1.06                          | 6.78E-01                        | 0.42                            |
|             | Amino acids, basic          | Lysine        | 1.05                                     | 1.14                                       | 1.40E-04                                   | 3.02E-13                                     | 4.23                                       | 10.89                                        | 1.05E-03                | 5.23E-12                  | 0.97                          | 7.58E-01                        | -0.31                           |
|             | Amino acids, branched chain | Isoleucine    | 1.02                                     | 1.07                                       | 1.02E-01                                   | 1.80E-05                                     | 1.67                                       | 4.90                                         | 3.66E-01                | 1.16E-04                  | 1.39                          | 4.01E-05                        | 5.60                            |
|             | Amino acids, branched chain | Leucine       | 1.16                                     | 1.17                                       | 1.46E-15                                   | 1.91E-16                                     | 13.00                                      | 13.86                                        | 4.12E-14                | 4.78E-15                  | 1.33                          | 2.09E-04                        | 4.77                            |

|                           |                             |                                      |      |      |          |          |       |       |          |          |      |          |       |
|---------------------------|-----------------------------|--------------------------------------|------|------|----------|----------|-------|-------|----------|----------|------|----------|-------|
|                           | Amino acids, branched chain | Valine                               | 1.07 | 1.06 | 5.34E-10 | 2.19E-09 | 8.25  | 7.78  | 6.68E-09 | 2.35E-08 | 1.25 | 7.52E-03 | 3.06  |
|                           | Amino acids, neutral        | Alanine                              | 1.11 | 1.11 | 2.39E-12 | 2.73E-12 | 10.36 | 10.31 | 4.22E-11 | 4.10E-11 | 1.06 | 5.43E-01 | 0.62  |
|                           | Amino acids, neutral        | Glycine                              | 1.30 | 1.19 | 2.53E-18 | 7.37E-13 | 15.84 | 10.56 | 1.14E-16 | 1.18E-11 | 1.00 | 9.89E-01 | -0.01 |
|                           | Amino acids, neutral        | Proline                              | 1.01 | 1.05 | 2.69E-01 | 1.01E-05 | 1.12  | 5.09  | 6.11E-01 | 6.89E-05 | 1.22 | 1.39E-01 | 1.56  |
|                           | Amino acids, neutral        | Serine                               | 1.31 | 1.33 | 4.39E-19 | 1.30E-19 | 16.69 | 17.30 | 2.47E-17 | 4.89E-18 | 0.97 | 6.78E-01 | -0.42 |
|                           | Amino acids, neutral        | Threonine                            | 1.04 | 1.07 | 2.82E-03 | 4.14E-06 | 3.19  | 5.37  | 1.67E-02 | 3.01E-05 | 0.90 | 5.26E-01 | -0.65 |
|                           | Amino acids, S-containing   | Cysteine (add. Cystine)              | 0.64 | 0.88 | 1.60E-05 | 1.47E-01 | -4.94 | -1.48 | 1.44E-04 | 4.41E-01 | 1.12 | 2.53E-01 | 1.19  |
|                           | Amino acids, S-containing   | Cystine                              | 0.68 | 0.99 | 2.18E-08 | 8.19E-01 | -7.04 | -0.23 | 2.45E-07 | 9.59E-01 | 1.15 | 2.76E-01 | 1.13  |
|                           | Amino acids, S-containing   | Methionine                           | 1.05 | 1.10 | 1.75E-03 | 4.93E-07 | 3.37  | 6.05  | 1.06E-02 | 4.44E-06 | 1.16 | 5.53E-02 | 2.07  |
|                           | Amino acids, S-containing   | Taurine                              | 1.00 | 1.76 | 8.59E-01 | 2.80E-24 | 0.18  | 24.20 | 9.52E-01 | 2.10E-22 | 1.05 | 7.23E-01 | 0.36  |
| Amino acids related       | Amino acid metabolites      | 5-Oxoproline (3 additional)          | 1.11 | 1.18 | 3.27E-05 | 5.46E-09 | 4.71  | 7.49  | 2.83E-04 | 5.34E-08 | 1.17 | 1.31E-02 | 2.79  |
|                           | Amino acid metabolites      | beta-Alanine (add. Pantothenic acid) | 1.04 | 1.26 | 2.33E-01 | 3.19E-09 | 1.21  | 7.66  | 5.89E-01 | 3.26E-08 | 1.44 | 4.29E-03 | 3.32  |
|                           | Collagen metabolism         | trans-4-Hydroxyproline               | 1.13 | 1.09 | 7.95E-07 | 1.72E-04 | 5.89  | 4.17  | 8.13E-06 | 1.02E-03 | 1.56 | 1.28E-01 | 1.60  |
|                           | Urea cycle and related      | Ornithine                            | 1.11 | 1.56 | 4.32E-06 | 4.48E-23 | 5.36  | 21.79 | 4.05E-05 | 2.52E-21 | 1.22 | 5.57E-02 | 2.06  |
|                           | Urea cycle and related      | Urea                                 | 0.86 | 0.86 | 3.17E-02 | 3.33E-02 | -2.27 | -2.24 | 1.55E-01 | 1.50E-01 | 1.05 | 7.45E-01 | 0.33  |
| Carbohydrates and related | Aminosugars                 | Glucosamine                          | 0.99 | 0.86 | 9.19E-01 | 8.92E-03 | -0.10 | -2.76 | 9.62E-01 | 4.90E-02 | 1.04 | 6.68E-01 | 0.44  |

|                                         |                                |                                                         |      |      |          |          |        |       |          |          |      |          |       |
|-----------------------------------------|--------------------------------|---------------------------------------------------------|------|------|----------|----------|--------|-------|----------|----------|------|----------|-------|
|                                         | Monosaccharides                | Glucose                                                 | 0.90 | 0.67 | 2.18E-01 | 1.46E-05 | -1.25  | -4.97 | 5.89E-01 | 9.65E-05 | 1.02 | 8.96E-01 | 0.13  |
|                                         | Monosaccharides                | Mannose                                                 | 0.95 | 0.76 | 3.58E-01 | 3.27E-06 | -0.93  | -5.45 | 6.50E-01 | 2.54E-05 | 1.05 | 7.59E-01 | 0.31  |
|                                         | Nucleobase related saccharides | Ribose                                                  | 3.79 | 1.00 | 2.44E-12 | 9.87E-01 | 10.23  | 0.02  | 4.22E-11 | 9.95E-01 | 1.34 | 1.37E-01 | 1.57  |
|                                         | Polyols                        | myo-Inositol                                            | 1.03 | 1.24 | 1.15E-01 | 9.55E-16 | 1.61   | 13.18 | 3.81E-01 | 2.15E-14 | 1.08 | 4.52E-01 | 0.77  |
|                                         | Polyols                        | scyllo-Inositol                                         | 1.06 | 1.15 | 9.41E-02 | 3.67E-04 | 1.72   | 3.91  | 3.53E-01 | 2.12E-03 | 0.99 | 9.69E-01 | -0.04 |
|                                         | Sugar acids                    | Erythronic acid                                         | 1.10 | 1.12 | 4.56E-02 | 1.93E-02 | 2.07   | 2.44  | 2.05E-01 | 9.44E-02 | 0.99 | 9.50E-01 | -0.06 |
| Complex lipids, fatty acids and related | Bile acids                     | Glycochenodeoxycholic acid (add. Glycodeoxycholic acid) | 0.91 | 0.81 | 3.94E-01 | 4.19E-02 | -0.86  | -2.11 | 6.64E-01 | 1.78E-01 | 1.05 | 9.34E-01 | 0.08  |
|                                         | Ceramides                      | Ceramide (d18:1,C24:1) (add. Ceramide (d18:2,C24:0))    | 1.12 | 1.04 | 3.72E-02 | 4.11E-01 | 2.16   | 0.83  | 1.74E-01 | 7.57E-01 | 0.98 | 9.47E-01 | -0.07 |
|                                         | Cholesterylesters              | Cholesterylester, total                                 | 0.91 | 0.97 | 3.80E-03 | 3.36E-01 | -3.08  | -0.97 | 2.19E-02 | 6.71E-01 | 0.89 | 6.24E-01 | -0.50 |
|                                         | Fatty acids, mono-unsaturated  | Eicosaenoic acid (C20:cis[11]1)                         | 1.04 | 1.12 | 3.70E-01 | 1.92E-02 | 0.91   | 2.45  | 6.50E-01 | 9.44E-02 | 1.06 | 8.05E-01 | 0.25  |
|                                         | Fatty acids, saturated         | Isopalmitic acid (C16:0)                                | 1.04 | 1.09 | 2.95E-01 | 2.56E-02 | 1.06   | 2.33  | 6.33E-01 | 1.20E-01 | 0.56 | 5.80E-02 | -2.04 |
|                                         | Lipid hydroperoxides           | Phosphatidylcholine hydroperoxide (C16:0,C18:2-OOH)     | 0.77 | 0.96 | 1.82E-02 | 6.74E-01 | -2.51  | -0.43 | 9.74E-02 | 8.86E-01 | 0.95 | 8.31E-01 | -0.22 |
|                                         | Lipid precursors               | Glycerol-3-phosphate, polar fraction                    | 1.64 | 1.64 | 1.20E-11 | 1.02E-11 | 9.65   | 9.71  | 1.80E-10 | 1.36E-10 | 1.03 | 8.13E-01 | 0.24  |
|                                         | Lipid precursors               | O-Phosphoethanolamine                                   | 0.19 | 2.67 | 4.76E-15 | 1.79E-09 | -12.88 | 7.98  | 1.19E-13 | 2.01E-08 | 0.93 | 7.06E-01 | -0.38 |
|                                         | Lysophosphatidylcholines       | Lysophosphatidylcholine (C16:0)                         | 0.95 | 0.98 | 3.01E-06 | 1.12E-01 | -5.47  | -1.63 | 2.94E-05 | 3.65E-01 | 0.98 | 2.40E-01 | -1.22 |
|                                         | Lysophosphatidylcholines       | Lysophosphatidylcholine (C17:0)                         | 1.81 | 1.26 | 2.75E-16 | 3.78E-06 | 13.71  | 5.40  | 1.03E-14 | 2.84E-05 | 0.89 | 4.88E-01 | -0.71 |

|                               |                             |                                                                                       |      |      |          |          |       |       |          |          |      |          |       |
|-------------------------------|-----------------------------|---------------------------------------------------------------------------------------|------|------|----------|----------|-------|-------|----------|----------|------|----------|-------|
|                               | Lysophosphatidylcholines    | Lysophosphatidylcholine (C18:0)                                                       | 1.56 | 1.09 | 2.10E-10 | 1.07E-01 | 8.56  | 1.65  | 2.78E-09 | 3.64E-01 | 1.02 | 8.79E-01 | 0.15  |
|                               | Lysophosphatidylcholines    | Lysophosphatidylcholine (C18:1)                                                       | 1.22 | 1.06 | 4.37E-09 | 3.42E-02 | 7.56  | 2.20  | 5.18E-08 | 1.51E-01 | 1.01 | 9.01E-01 | 0.13  |
|                               | Lysophosphatidylcholines    | Lysophosphatidylcholine (C20:4)                                                       | 1.29 | 1.05 | 9.25E-05 | 3.83E-01 | 4.37  | 0.88  | 7.71E-04 | 7.48E-01 | 1.11 | 4.00E-01 | 0.86  |
|                               | Phosphatidylcholines        | Phosphatidylcholine (C16:1,C18:2)                                                     | 0.92 | 0.96 | 1.17E-03 | 1.12E-01 | -3.51 | -1.63 | 7.30E-03 | 3.65E-01 | 0.85 | 2.38E-01 | -1.22 |
|                               | Phosphatidylcholines        | Phosphatidylcholine (C18:0,C22:6)                                                     | 1.05 | 1.04 | 1.95E-02 | 7.76E-02 | 2.44  | 1.81  | 1.02E-01 | 3.00E-01 | 0.93 | 5.96E-01 | -0.54 |
|                               | Sphingomyelins              | Sphingomyelin (d18:1,C24:0)                                                           | 1.00 | 1.07 | 8.63E-01 | 1.51E-02 | 0.17  | 2.55  | 9.52E-01 | 7.89E-02 | 1.04 | 6.42E-01 | 0.47  |
|                               | Triacylglycerols            | TAG (C16:0,C16:1)                                                                     | 0.88 | 1.00 | 1.13E-02 | 9.94E-01 | -2.66 | -0.01 | 6.22E-02 | 9.95E-01 | 0.76 | 5.97E-01 | -0.54 |
|                               | Triacylglycerols            | TAG (C16:0,C18:1,C18:2)                                                               | 0.82 | 0.94 | 9.97E-05 | 2.10E-01 | -4.35 | -1.28 | 8.01E-04 | 5.43E-01 | 1.01 | 9.83E-01 | 0.02  |
|                               | Triacylglycerols            | TAG (C16:0,C18:1,C18:3)<br>(add. TAG (C16:0,C18:2,C18:2),<br>TAG (C16:1,C18:1,C18:2)) | 0.90 | 1.01 | 2.61E-02 | 8.52E-01 | -2.32 | 0.19  | 1.33E-01 | 9.60E-01 | 1.03 | 9.34E-01 | 0.08  |
|                               | Triacylglycerols            | TAG (C16:0,C18:2)                                                                     | 0.91 | 1.02 | 2.91E-02 | 6.49E-01 | -2.27 | 0.46  | 1.46E-01 | 8.75E-01 | 0.85 | 6.59E-01 | -0.45 |
|                               | Triacylglycerols            | TAG (C18:1,C18:2)                                                                     | 0.85 | 1.00 | 1.78E-04 | 9.64E-01 | -4.15 | 0.05  | 1.25E-03 | 9.95E-01 | 1.03 | 9.43E-01 | 0.07  |
| Energy metabolism and related | Citrate cycle               | Citrate                                                                               | 1.05 | 1.08 | 2.00E-01 | 3.75E-02 | 1.31  | 2.16  | 5.83E-01 | 1.62E-01 | 0.94 | 6.43E-01 | -0.47 |
|                               | Citrate cycle               | Isocitrate                                                                            | 1.12 | 1.20 | 1.33E-04 | 3.76E-08 | 4.25  | 6.86  | 1.03E-03 | 3.52E-07 | 1.01 | 9.58E-01 | 0.05  |
|                               | Citrate cycle               | Malate                                                                                | 1.06 | 1.54 | 2.23E-01 | 3.12E-11 | 1.24  | 9.22  | 5.89E-01 | 3.69E-10 | 1.20 | 6.62E-02 | 1.97  |
|                               | Glycolysis/ Gluconeogenesis | Glucose-6-phosphate (4 additional)                                                    | 0.66 | 1.77 | 1.74E-04 | 1.07E-06 | -4.17 | 5.83  | 1.25E-03 | 8.58E-06 | 1.04 | 8.38E-01 | 0.21  |
|                               | Glycolysis/ Gluconeogenesis | Glycerate                                                                             | 1.42 | 1.55 | 7.62E-11 | 1.13E-13 | 8.91  | 11.26 | 1.07E-09 | 2.12E-12 | 1.04 | 5.74E-01 | 0.57  |

|                                 |                             |                                     |      |      |          |          |       |       |          |          |      |          |       |
|---------------------------------|-----------------------------|-------------------------------------|------|------|----------|----------|-------|-------|----------|----------|------|----------|-------|
|                                 | Glycolysis/ Gluconeogenesis | Lactate                             | 1.01 | 1.88 | 8.60E-01 | 4.05E-20 | 0.18  | 17.91 | 9.52E-01 | 1.82E-18 | 1.33 | 1.04E-01 | 1.72  |
|                                 | Glycolysis/ Gluconeogenesis | Pyruvate (add. Phosphoenolpyruvate) | 0.96 | 0.84 | 2.22E-01 | 7.84E-07 | -1.24 | -5.90 | 5.89E-01 | 6.78E-06 | 1.14 | 5.16E-01 | 0.66  |
|                                 | Ketone bodies               | 3-Hydroxybutyrate                   | 0.98 | 0.96 | 2.54E-01 | 2.75E-02 | -1.16 | -2.29 | 6.01E-01 | 1.26E-01 | 1.12 | 8.70E-01 | 0.17  |
| Nucleobases and related         | Purine metabolism           | Hypoxanthine                        | 1.82 | 2.59 | 1.14E-11 | 8.05E-18 | 9.57  | 15.29 | 1.80E-10 | 2.27E-16 | 1.13 | 3.19E-01 | 1.03  |
|                                 | Purine metabolism           | Uric acid                           | 1.04 | 1.04 | 7.45E-03 | 1.12E-02 | 2.83  | 2.67  | 4.19E-02 | 5.99E-02 | 1.44 | 1.19E-02 | 2.84  |
|                                 | Purine metabolism           | Xanthine                            | 2.12 | 1.98 | 4.82E-13 | 6.12E-12 | 10.72 | 9.79  | 9.86E-12 | 8.61E-11 | 1.16 | 2.72E-01 | 1.14  |
|                                 | Pyrimidine metabolism       | Uridine                             | 0.98 | 1.31 | 5.90E-01 | 1.37E-11 | -0.54 | 9.60  | 8.22E-01 | 1.72E-10 | 0.99 | 9.32E-01 | -0.09 |
| Vitamins, cofactors and related | Ascorbic acid and related   | Threonic acid                       | 2.26 | 2.31 | 1.07E-14 | 5.35E-15 | 12.18 | 12.47 | 2.42E-13 | 1.09E-13 | 1.21 | 2.59E-01 | 1.17  |

**Table S2: Metabolites in human serum that were found to be robust to pre-analytical confounders.** Forty analytes with final chemical structure identity pending are not given. Statistical analysis was done via ANOVA models (see Material and Methods). A p-value of > 0.05 or a FDR of > 0.2 was considered as statistically not significant.

| Ontology 1  | Ontology 2            | Metabolite | Serum storage 24 h, ratio versus control | Blood incubation 6 h, ratio versus control | Serum storage 24 h, p-value versus control | Blood incubation 6 h, p-value versus control | Serum storage 24 h, t-value versus control | Blood incubation 6 h, t-value versus control | Serum storage 24 h, FDR | Blood incubation 6 h, FDR | Sex, ratio male versus female | Sex, p-value male versus female | Sex, t-value male versus female |
|-------------|-----------------------|------------|------------------------------------------|--------------------------------------------|--------------------------------------------|----------------------------------------------|--------------------------------------------|----------------------------------------------|-------------------------|---------------------------|-------------------------------|---------------------------------|---------------------------------|
| Amino acids | Amino acids, aromatic | Tryptophan | 1.01                                     | 1.00                                       | 5.18E-01                                   | 8.05E-01                                     | 0.65                                       | 0.25                                         | 0.78                    | 0.96                      | 0.95                          | 6.79E-01                        | -0.42                           |
|             | Amino acids, basic    | Glutamine  | 1.01                                     | 1.03                                       | 5.09E-01                                   | 1.18E-01                                     | 0.67                                       | 1.60                                         | 0.78                    | 0.38                      | 1.21                          | 3.44E-02                        | 2.31                            |

|                                         |                        |                                                          |      |      |          |          |       |       |      |      |      |          |       |
|-----------------------------------------|------------------------|----------------------------------------------------------|------|------|----------|----------|-------|-------|------|------|------|----------|-------|
| Amino acids related                     | Amino acid metabolites | 3-Hydroxyisobutyrate                                     | 1.05 | 1.05 | 2.08E-01 | 2.09E-01 | 1.28  | 1.28  | 0.59 | 0.54 | 1.27 | 2.62E-01 | 1.16  |
|                                         | Amino acid metabolites | beta-Aminoisobutyrate                                    | 1.03 | 0.96 | 3.79E-01 | 2.12E-01 | 0.89  | -1.27 | 0.66 | 0.54 | 0.98 | 9.48E-01 | -0.07 |
|                                         | Amino acid metabolites | Ketoleucine                                              | 1.01 | 0.98 | 7.15E-01 | 3.37E-01 | 0.37  | -0.97 | 0.89 | 0.67 | 1.29 | 8.24E-04 | 4.11  |
|                                         | Creatine metabolism    | Creatine                                                 | 1.06 | 1.02 | 1.02E-01 | 5.62E-01 | 1.68  | 0.59  | 0.37 | 0.84 | 0.79 | 3.73E-01 | -0.92 |
|                                         | Creatine metabolism    | Creatinine                                               | 1.03 | 0.97 | 4.95E-01 | 4.70E-01 | 0.69  | -0.73 | 0.77 | 0.79 | 1.26 | 1.01E-01 | 1.74  |
|                                         | Tryptophan metabolism  | 3-Indoxylsulfate                                         | 0.99 | 0.93 | 9.49E-01 | 5.73E-01 | -0.06 | -0.57 | 0.97 | 0.85 | 0.86 | 7.51E-01 | -0.32 |
|                                         | Tryptophan metabolism  | Indole-3-acetic acid                                     | 1.00 | 1.01 | 9.29E-01 | 8.08E-01 | 0.09  | 0.25  | 0.96 | 0.96 | 1.23 | 3.45E-01 | 0.97  |
|                                         | Tryptophan metabolism  | Indole-3-lactic acid                                     | 1.02 | 0.99 | 5.49E-01 | 7.26E-01 | 0.60  | -0.35 | 0.80 | 0.91 | 0.91 | 4.36E-01 | -0.80 |
|                                         | Tyrosine metabolism    | Cresol sulfate (add. m-Cresol sulfate, o-Cresol sulfate) | 0.93 | 0.97 | 6.04E-01 | 8.42E-01 | -0.52 | -0.20 | 0.82 | 0.96 | 0.34 | 1.75E-02 | -2.65 |
|                                         | Urea cycle and related | Citrulline                                               | 1.02 | 0.96 | 3.55E-01 | 1.01E-01 | 0.94  | -1.68 | 0.65 | 0.35 | 1.26 | 1.55E-01 | 1.49  |
| Carbohydrates and related               | Aminosugars            | Mannosamine                                              | 0.96 | 0.88 | 6.12E-01 | 8.08E-02 | -0.51 | -1.80 | 0.82 | 0.30 | 1.15 | 1.44E-01 | 1.54  |
|                                         | Polyols                | 1,5-Anhydrosorbitol                                      | 0.98 | 0.97 | 1.64E-01 | 8.69E-02 | -1.42 | -1.76 | 0.51 | 0.32 | 1.52 | 2.04E-02 | 2.57  |
|                                         | Polyols                | Erythrol                                                 | 1.01 | 1.05 | 7.72E-01 | 1.29E-01 | 0.29  | 1.55  | 0.93 | 0.40 | 0.96 | 7.02E-01 | -0.39 |
| Complex lipids, fatty acids and related | Alkane hydrocarbons    | Hentriacontane                                           | 0.99 | 0.99 | 6.49E-01 | 8.01E-01 | -0.46 | -0.25 | 0.84 | 0.96 | 0.73 | 7.33E-02 | -1.92 |
|                                         | Bile acids             | Glycocholic acid                                         | 0.92 | 0.89 | 6.03E-01 | 4.87E-01 | -0.53 | -0.70 | 0.82 | 0.79 | 0.94 | 9.37E-01 | -0.08 |
|                                         | Bile acids             | Taurocholic acid                                         | 0.94 | 0.96 | 6.10E-01 | 6.95E-01 | -0.51 | -0.39 | 0.82 | 0.90 | 0.40 | 2.17E-01 | -1.29 |

|                               |                                                                                                    |      |      |          |          |       |       |      |      |      |          |       |
|-------------------------------|----------------------------------------------------------------------------------------------------|------|------|----------|----------|-------|-------|------|------|------|----------|-------|
| Ceramides                     | Ceramide (d18:1,C24:0)                                                                             | 1.07 | 1.02 | 1.14E-01 | 6.55E-01 | 1.62  | 0.45  | 0.38 | 0.88 | 0.85 | 4.79E-01 | -0.73 |
| Cholesterol and related       | Cholesta-2,4,6-triene                                                                              | 1.04 | 0.94 | 5.66E-01 | 3.96E-01 | 0.58  | -0.86 | 0.81 | 0.75 | 0.77 | 1.62E-01 | -1.47 |
| Cholesterol and related       | Cholesta-2,4-dien                                                                                  | 0.97 | 0.99 | 7.10E-01 | 8.93E-01 | -0.37 | -0.14 | 0.89 | 0.97 | 0.66 | 5.15E-02 | -2.10 |
| Cholesterol and related       | Cholestenol No 02                                                                                  | 1.05 | 1.02 | 3.91E-01 | 7.22E-01 | 0.87  | 0.36  | 0.66 | 0.91 | 0.73 | 9.94E-02 | -1.75 |
| Cholesterol and related       | Cholesterol, free                                                                                  | 0.92 | 1.00 | 2.28E-01 | 9.95E-01 | -1.23 | -0.01 | 0.59 | 1.00 | 0.91 | 2.23E-01 | -1.27 |
| Cholesterol and related       | Cholesterol, total                                                                                 | 0.97 | 0.98 | 2.39E-01 | 4.43E-01 | -1.20 | -0.78 | 0.59 | 0.79 | 0.74 | 4.83E-02 | -2.14 |
| Cholesterylesters             | Cholesterylester C20:4                                                                             | 1.20 | 1.11 | 5.24E-02 | 2.82E-01 | 2.00  | 1.09  | 0.23 | 0.64 | 0.81 | 4.83E-01 | -0.72 |
| Diacylglycerols               | DAG (C18:1,C18:2)                                                                                  | 1.14 | 1.04 | 2.27E-01 | 6.77E-01 | 1.23  | 0.42  | 0.59 | 0.89 | 1.04 | 8.96E-01 | 0.13  |
| Fatty acids, branched         | 14-Methylhexadecanoic acid                                                                         | 1.01 | 1.02 | 6.41E-01 | 4.35E-01 | 0.47  | 0.79  | 0.84 | 0.79 | 0.59 | 1.17E-01 | -1.66 |
| Fatty acids, mono-unsaturated | Elaidic acid (C18:trans[9]1)                                                                       | 0.96 | 0.97 | 3.46E-01 | 4.71E-01 | -0.96 | -0.73 | 0.65 | 0.79 | 0.83 | 4.15E-01 | -0.84 |
| Fatty acids, mono-unsaturated | Nervonic acid (C24:cis[15]1)                                                                       | 1.05 | 1.03 | 6.89E-02 | 3.01E-01 | 1.88  | 1.05  | 0.28 | 0.64 | 0.69 | 4.28E-02 | -2.20 |
| Fatty acids, mono-unsaturated | Oleic acid (C18:cis[9]1)                                                                           | 1.01 | 1.02 | 6.47E-01 | 4.67E-01 | 0.46  | 0.74  | 0.84 | 0.79 | 0.81 | 4.76E-01 | -0.73 |
| Fatty acids, mono-unsaturated | Palmitoleic acid (C16:cis[9]1)                                                                     | 0.95 | 0.99 | 1.08E-01 | 8.64E-01 | -1.65 | -0.17 | 0.38 | 0.96 | 0.62 | 2.97E-01 | -1.08 |
| Fatty acids, poly-unsaturated | Arachidonic acid (C20:cis[5,8,11,14]4)                                                             | 1.00 | 1.01 | 8.19E-01 | 6.01E-01 | -0.23 | 0.53  | 0.95 | 0.86 | 0.91 | 6.67E-01 | -0.44 |
| Fatty acids, poly-unsaturated | Conjugated Linoleic acid (C18:trans[9,11]2) (add. conjugated Linoleic acid (C18:cis[9]trans[11]2)) | 0.97 | 1.03 | 3.68E-01 | 4.87E-01 | -0.91 | 0.70  | 0.65 | 0.79 | 0.79 | 3.45E-01 | -0.97 |
| Fatty acids, poly-unsaturated | dihomo-gamma-Linolenic acid (C20:cis[8,11,14]3)                                                    | 1.02 | 1.02 | 3.20E-01 | 3.44E-01 | 1.01  | 0.96  | 0.63 | 0.68 | 0.76 | 3.53E-01 | -0.96 |

|                               |                                                 |      |      |          |          |       |       |      |      |      |          |       |
|-------------------------------|-------------------------------------------------|------|------|----------|----------|-------|-------|------|------|------|----------|-------|
| Fatty acids, poly-unsaturated | Docosapentaenoic acid (C22:cis[4,7,10,13,16]5)  | 0.98 | 1.01 | 6.51E-01 | 8.60E-01 | -0.46 | 0.18  | 0.84 | 0.96 | 0.62 | 1.72E-01 | -1.44 |
| Fatty acids, poly-unsaturated | Docosapentaenoic acid (C22:cis[7,10,13,16,19]5) | 0.96 | 0.99 | 3.10E-01 | 8.54E-01 | -1.04 | -0.19 | 0.63 | 0.96 | 1.56 | 6.84E-02 | 2.02  |
| Fatty acids, poly-unsaturated | Eicosadienoic acid (C20:2) No 02                | 0.98 | 1.02 | 7.94E-01 | 8.22E-01 | -0.26 | 0.23  | 0.95 | 0.96 | 0.79 | 4.40E-01 | -0.79 |
| Fatty acids, poly-unsaturated | Eicosapentaenoic acid (C20:cis[5,8,11,14,17]5)  | 1.02 | 1.03 | 4.36E-01 | 2.62E-01 | 0.79  | 1.15  | 0.70 | 0.63 | 1.28 | 4.52E-01 | 0.78  |
| Fatty acids, poly-unsaturated | gamma-Linolenic acid (C18:cis[6,9,12]3)         | 1.03 | 1.01 | 3.64E-01 | 8.02E-01 | 0.92  | 0.25  | 0.65 | 0.96 | 0.89 | 7.54E-01 | -0.32 |
| Fatty acids, poly-unsaturated | Linoleic acid (C18:cis[9,12]2)                  | 1.00 | 1.01 | 8.66E-01 | 5.59E-01 | 0.17  | 0.59  | 0.95 | 0.84 | 0.72 | 1.38E-01 | -1.56 |
| Fatty acids, saturated        | Behenic acid (C22:0)                            | 0.98 | 1.00 | 4.03E-01 | 9.79E-01 | -0.85 | 0.03  | 0.67 | 1.00 | 0.76 | 1.63E-02 | -2.68 |
| Fatty acids, saturated        | Eicosanoic acid (C20:0)                         | 0.96 | 1.00 | 1.23E-01 | 9.91E-01 | -1.58 | -0.01 | 0.40 | 1.00 | 0.67 | 7.11E-04 | -4.18 |
| Fatty acids, saturated        | Heptadecanoic acid (C17:0)                      | 0.94 | 0.96 | 5.65E-02 | 2.43E-01 | -1.97 | -1.19 | 0.24 | 0.60 | 0.77 | 2.06E-01 | -1.32 |
| Fatty acids, saturated        | Lignoceric acid (C24:0)                         | 0.98 | 0.99 | 3.73E-01 | 6.31E-01 | -0.90 | -0.48 | 0.65 | 0.87 | 0.83 | 2.26E-01 | -1.26 |
| Fatty acids, saturated        | Palmitic acid (C16:0)                           | 0.99 | 1.01 | 8.01E-01 | 6.16E-01 | -0.25 | 0.51  | 0.95 | 0.86 | 0.81 | 4.53E-01 | -0.77 |
| Fatty acids, saturated        | Stearic acid (C18:0)                            | 0.99 | 1.01 | 7.36E-01 | 5.92E-01 | -0.34 | 0.54  | 0.90 | 0.86 | 0.84 | 3.39E-01 | -0.98 |
| Fatty acids, saturated        | Tricosanoic acid (C23:0)                        | 1.02 | 1.04 | 6.27E-01 | 2.69E-01 | 0.49  | 1.12  | 0.84 | 0.63 | 0.61 | 1.07E-02 | -2.89 |
| Fatty alcohols                | Dodecanol                                       | 0.91 | 0.93 | 1.83E-01 | 3.06E-01 | -1.36 | -1.04 | 0.55 | 0.64 | 0.86 | 4.49E-01 | -0.78 |
| Fatty alcohols                | Glycerol, lipid fraction                        | 1.00 | 1.02 | 9.31E-01 | 5.40E-01 | 0.09  | 0.62  | 0.96 | 0.82 | 0.90 | 8.09E-01 | -0.25 |
| Fatty alcohols                | Hexadecanol                                     | 0.98 | 1.00 | 6.39E-01 | 9.11E-01 | -0.47 | -0.11 | 0.84 | 0.98 | 0.93 | 3.45E-01 | -0.97 |



|                               |                                                                                                                                                                             |      |      |          |          |       |       |      |      |      |          |       |
|-------------------------------|-----------------------------------------------------------------------------------------------------------------------------------------------------------------------------|------|------|----------|----------|-------|-------|------|------|------|----------|-------|
| Fatty alcohols                | Pentadecanol                                                                                                                                                                | 0.98 | 1.02 | 5.24E-01 | 6.34E-01 | -0.64 | 0.48  | 0.78 | 0.87 | 0.92 | 8.19E-01 | -0.23 |
| Fatty alcohols                | Tetradecanol                                                                                                                                                                | 0.94 | 0.97 | 2.03E-01 | 4.59E-01 | -1.30 | -0.75 | 0.59 | 0.79 | 0.95 | 4.03E-01 | -0.86 |
| Glycolipids                   | Galactose, lipid fraction                                                                                                                                                   | 1.00 | 1.01 | 9.70E-01 | 8.99E-01 | -0.04 | 0.13  | 0.98 | 0.97 | 0.86 | 9.45E-02 | -1.78 |
| Glycolipids                   | Glucose, lipid fraction                                                                                                                                                     | 0.99 | 0.96 | 9.39E-01 | 7.88E-01 | -0.08 | -0.27 | 0.96 | 0.96 | 1.23 | 1.52E-01 | 1.51  |
| Lipid hydroperoxides          | Cholesterylester hydroperoxide (C18:2-9-OOH) (add. Cholesterylester hydroperoxide (C18:2-13-OOH))                                                                           | 1.29 | 1.16 | 2.42E-01 | 4.86E-01 | 1.19  | 0.71  | 0.59 | 0.79 | 1.11 | 6.45E-01 | 0.47  |
| Lipid hydroperoxides          | Phosphatidylcholine hydroperoxide (C16:0,C18:1-OOH)                                                                                                                         | 0.74 | 0.69 | 1.13E-01 | 6.51E-02 | -1.63 | -1.90 | 0.38 | 0.26 | 1.17 | 6.85E-01 | 0.41  |
| Lipid hydroperoxides          | Phosphatidylcholine hydroperoxide (C18:0,C18:2-OOH)                                                                                                                         | 0.95 | 0.98 | 5.24E-01 | 8.45E-01 | -0.64 | -0.20 | 0.78 | 0.96 | 0.99 | 9.65E-01 | -0.04 |
| Lipid hydroperoxides          | Triacylglyceride hydroperoxide (C16:0,C18:1,C18:2-OOH)                                                                                                                      | 0.96 | 1.02 | 8.40E-01 | 9.32E-01 | -0.20 | 0.09  | 0.95 | 0.99 | 0.75 | 2.52E-01 | -1.19 |
| Lipid hydroperoxides          | Triacylglyceride hydroperoxide (C16:0,C18:1,C18:3-OOH) (add. Triacylglyceride hydroperoxide (C16:0,C18:2,C18:2-OOH))                                                        | 0.96 | 1.14 | 8.37E-01 | 4.58E-01 | -0.21 | 0.75  | 0.95 | 0.79 | 0.58 | 8.88E-02 | -1.81 |
| Lipid hydroperoxides          | Triacylglyceride hydroperoxide (C18:1,18:2,C18:2-OOH) (add. Triacylglyceride hydroperoxide (C16:0,C18:1,C20:4-OOH), Triacylglyceride hydroperoxide (C18:1,C18:1,C18:3-OOH)) | 0.83 | 1.00 | 3.08E-01 | 9.89E-01 | -1.03 | -0.01 | 0.63 | 1.00 | 0.77 | 3.73E-01 | -0.92 |
| Lipid precursors              | Glycerol, polar fraction                                                                                                                                                    | 1.17 | 1.17 | 8.55E-02 | 9.04E-02 | 1.77  | 1.74  | 0.34 | 0.33 | 0.89 | 5.89E-01 | -0.55 |
| Lysophosphatidylcholines      | Lysophosphatidylcholine (C18:2)                                                                                                                                             | 1.09 | 1.03 | 5.13E-02 | 5.58E-01 | 2.01  | 0.59  | 0.23 | 0.84 | 1.18 | 4.67E-01 | 0.75  |
| Lysophosphatidylethanolamines | Lysophosphatidylethanolamine (C22:5)                                                                                                                                        | 0.93 | 0.92 | 2.68E-01 | 1.79E-01 | -1.12 | -1.37 | 0.61 | 0.52 | 0.92 | 5.88E-01 | -0.55 |
| Phosphatidylcholines          | Phosphatidylcholine (C16:0,C16:0)                                                                                                                                           | 0.97 | 0.98 | 2.53E-01 | 3.23E-01 | -1.16 | -1.00 | 0.60 | 0.66 | 0.90 | 1.21E-01 | -1.64 |
| Phosphatidylcholines          | Phosphatidylcholine (C16:0,C18:2)                                                                                                                                           | 1.01 | 1.01 | 8.61E-02 | 5.00E-01 | 1.76  | 0.68  | 0.34 | 0.79 | 1.02 | 1.83E-01 | 1.39  |

|                          |                                                                                                                        |      |      |          |          |       |       |      |      |      |          |       |
|--------------------------|------------------------------------------------------------------------------------------------------------------------|------|------|----------|----------|-------|-------|------|------|------|----------|-------|
| Phosphatidylcholines     | Phosphatidylcholine (C16:0,C20:4)<br>(add. Phosphatidylcholine<br>(C18:2,C18:2))                                       | 0.99 | 1.00 | 2.45E-01 | 4.04E-01 | -1.18 | -0.84 | 0.59 | 0.76 | 1.01 | 4.82E-01 | 0.72  |
| Phosphatidylcholines     | Phosphatidylcholine (C16:0,C20:5)                                                                                      | 0.96 | 1.00 | 1.53E-01 | 9.63E-01 | -1.46 | 0.05  | 0.48 | 1.00 | 0.99 | 9.38E-01 | -0.08 |
| Phosphatidylcholines     | Phosphatidylcholine (C16:0,C22:6)<br>(add. Phosphatidylcholine<br>(C18:2,C20:4))                                       | 1.01 | 0.99 | 5.64E-01 | 3.94E-01 | 0.58  | -0.86 | 0.81 | 0.75 | 0.89 | 1.92E-01 | -1.36 |
| Phosphatidylcholines     | Phosphatidylcholine (C18:0,C18:1)                                                                                      | 0.99 | 1.01 | 1.94E-01 | 1.84E-01 | -1.32 | 1.35  | 0.58 | 0.52 | 0.87 | 2.34E-02 | -2.50 |
| Phosphatidylcholines     | Phosphatidylcholine (C18:0,C18:2)                                                                                      | 1.02 | 1.01 | 1.44E-01 | 2.11E-01 | 1.49  | 1.27  | 0.46 | 0.54 | 1.00 | 8.73E-01 | -0.16 |
| Phosphatidylcholines     | Phosphatidylcholine (C18:0,C20:3)<br>(add. Phosphatidylcholine<br>(C20:1,C18:2), Phosphatidylcholine<br>(C20:2,C18:1)) | 1.00 | 1.00 | 9.41E-01 | 6.47E-01 | 0.07  | 0.46  | 0.96 | 0.87 | 0.96 | 5.86E-01 | -0.56 |
| Phosphatidylcholines     | Phosphatidylcholine (C18:0,C20:4)                                                                                      | 1.00 | 0.99 | 8.49E-01 | 1.95E-01 | 0.19  | -1.32 | 0.95 | 0.54 | 1.01 | 8.36E-01 | 0.21  |
| Phosphatidylcholines     | Phosphatidylcholine (C18:1,C18:2)<br>(add. Phosphatidylcholine<br>(C16:0,C20:3))                                       | 1.01 | 1.00 | 9.12E-02 | 6.02E-01 | 1.73  | 0.53  | 0.35 | 0.86 | 0.98 | 6.60E-02 | -1.97 |
| Phosphatidylcholines     | Phosphatidylcholine No 02                                                                                              | 1.02 | 1.01 | 3.17E-01 | 7.72E-01 | 1.01  | 0.29  | 0.63 | 0.95 | 1.02 | 7.86E-01 | 0.28  |
| Phospholipid metabolites | Glycerol phosphate, lipid fraction                                                                                     | 0.99 | 0.97 | 8.23E-01 | 5.94E-01 | -0.23 | -0.54 | 0.95 | 0.86 | 0.66 | 7.18E-02 | -1.93 |
| Phospholipid metabolites | myo-Inositol-2-phosphate, lipid fraction<br>(myo-Inositolphospholipids)                                                | 0.89 | 0.93 | 2.96E-01 | 5.26E-01 | -1.06 | -0.64 | 0.63 | 0.80 | 0.58 | 9.62E-02 | -1.77 |
| Phospholipid metabolites | Phosphate, lipid fraction                                                                                              | 1.00 | 1.02 | 9.31E-01 | 2.40E-01 | -0.09 | 1.20  | 0.96 | 0.60 | 0.76 | 3.57E-02 | -2.29 |
| Plasmalogens             | Choline plasmalogen (C18,C20:4)                                                                                        | 1.03 | 0.97 | 2.82E-01 | 2.43E-01 | 1.09  | -1.19 | 0.63 | 0.60 | 1.04 | 6.99E-01 | 0.39  |
| Sphingolipids            | 1-Hydroxy-2-amino-(cis,trans)-3,5-<br>octadecadiene (from sphingolipids)                                               | 1.03 | 1.02 | 3.01E-01 | 4.93E-01 | 1.05  | 0.69  | 0.63 | 0.79 | 0.65 | 5.81E-03 | -3.18 |
| Sphingolipids            | 3-O-Methylsphingosine (d18:1) (add.<br>Sphingolipids, erythro-Sphingosine<br>(d18:1), threo-Sphingosine (d18:1))       | 1.02 | 1.02 | 4.33E-01 | 5.13E-01 | 0.79  | 0.66  | 0.70 | 0.79 | 0.65 | 5.03E-03 | -3.25 |

|                               |                                  |                                                                                                            |      |      |          |          |       |       |      |      |      |          |       |
|-------------------------------|----------------------------------|------------------------------------------------------------------------------------------------------------|------|------|----------|----------|-------|-------|------|------|------|----------|-------|
|                               | Sphingolipids                    | 4-Hydroxysphinganine (t18:0, Phytosphingosine), total                                                      | 0.98 | 0.97 | 6.38E-01 | 5.87E-01 | -0.47 | -0.55 | 0.84 | 0.86 | 0.74 | 4.79E-02 | -2.14 |
|                               | Sphingolipids                    | 5-O-Methylsphingosine (d18:1) (add. Sphingolipids, erythro-Sphingosine (d18:1), threo-Sphingosine (d18:1)) | 1.02 | 1.02 | 3.96E-01 | 3.27E-01 | 0.86  | 0.99  | 0.66 | 0.66 | 0.68 | 9.86E-03 | -2.93 |
|                               | Sphingolipids                    | erythro-Dihydrosphingosine (d16:0)                                                                         | 1.00 | 1.00 | 9.26E-01 | 8.55E-01 | 0.09  | 0.18  | 0.96 | 0.96 | 0.72 | 6.23E-02 | -2.00 |
|                               | Sphingolipids                    | erythro-Dihydrosphingosine (d18:0)                                                                         | 1.02 | 1.00 | 3.20E-01 | 8.66E-01 | 1.01  | 0.17  | 0.63 | 0.96 | 0.76 | 2.03E-01 | -1.33 |
|                               | Sphingolipids                    | erythro-Sphingosine (d18:1) (add. Sphingolipids)                                                           | 1.01 | 1.01 | 7.07E-01 | 7.09E-01 | 0.38  | 0.38  | 0.89 | 0.91 | 0.69 | 3.65E-03 | -3.40 |
|                               | Sphingolipids                    | threo-Sphingosine (d18:1) (add. Sphingolipids)                                                             | 1.00 | 1.01 | 9.28E-01 | 6.63E-01 | 0.09  | 0.44  | 0.96 | 0.88 | 0.72 | 8.80E-03 | -2.98 |
|                               | Sphingomyelins                   | Sphingomyelin (d18:1,C16:0)                                                                                | 0.99 | 0.97 | 5.78E-01 | 6.39E-02 | -0.56 | -1.91 | 0.82 | 0.26 | 1.01 | 4.82E-01 | 0.72  |
|                               | Sphingomyelins                   | Sphingomyelin (d18:1,C23:0)                                                                                | 0.95 | 0.97 | 2.31E-01 | 5.15E-01 | -1.22 | -0.66 | 0.59 | 0.79 | 0.76 | 2.69E-02 | -2.44 |
|                               | Sphingomyelins                   | Sphingomyelin (d18:1,C24:1) (add. Sphingomyelin (d18:2,C24:0))                                             | 0.94 | 0.97 | 7.92E-01 | 9.09E-01 | -0.26 | -0.11 | 0.95 | 0.98 | 0.99 | 9.57E-01 | -0.05 |
|                               | Sphingomyelins                   | Sphingomyelin (d18:2,C18:0)                                                                                | 1.01 | 1.00 | 3.70E-01 | 8.19E-01 | 0.91  | -0.23 | 0.65 | 0.96 | 0.75 | 1.04E-03 | -4.00 |
|                               | Sphingomyelins                   | Sphingomyelin No 01                                                                                        | 1.02 | 1.05 | 5.33E-01 | 2.04E-01 | 0.63  | 1.29  | 0.78 | 0.54 | 0.88 | 2.13E-01 | -1.30 |
|                               | Triacylglycerols                 | TAG (C18:1,C18:2,C18:3) (add. TAG (C16:0,C18:1,C20:5), TAG (C16:0,C18:2,C20:4))                            | 0.96 | 0.93 | 3.24E-01 | 9.30E-02 | -1.00 | -1.72 | 0.63 | 0.33 | 1.12 | 5.35E-01 | 0.63  |
|                               | Triacylglycerols                 | TAG (C18:2,C18:2)                                                                                          | 1.01 | 1.04 | 8.48E-01 | 4.90E-01 | 0.19  | 0.70  | 0.95 | 0.79 | 0.96 | 9.04E-01 | -0.12 |
| Energy metabolism and related | Citrate cycle                    | alpha-Ketoglutarate                                                                                        | 0.92 | 1.00 | 4.13E-01 | 9.81E-01 | -0.83 | -0.02 | 0.67 | 1.00 | 1.49 | 3.40E-02 | 2.32  |
|                               | Citrate cycle                    | Succinate                                                                                                  | 0.97 | 0.98 | 2.61E-01 | 2.87E-01 | -1.14 | -1.08 | 0.61 | 0.64 | 0.97 | 1.68E-01 | -1.45 |
|                               | Energy metabolism, miscellaneous | 2-Hydroxybutyrate                                                                                          | 1.02 | 1.03 | 3.21E-01 | 1.80E-01 | 1.00  | 1.37  | 0.63 | 0.52 | 1.29 | 3.96E-01 | 0.87  |

|                                         |                            |                                                               |      |      |          |          |       |       |      |      |      |          |       |
|-----------------------------------------|----------------------------|---------------------------------------------------------------|------|------|----------|----------|-------|-------|------|------|------|----------|-------|
| Hormones, signal substances and related | Steroids and related       | Cortisol                                                      | 0.77 | 0.82 | 4.38E-02 | 1.10E-01 | -2.09 | -1.63 | 0.20 | 0.36 | 0.57 | 1.20E-01 | -1.64 |
|                                         | Steroids and related       | Dehydroepiandrosterone sulfate (add. Testosterone-17-sulfate) | 0.93 | 0.89 | 4.53E-01 | 2.02E-01 | -0.76 | -1.30 | 0.72 | 0.54 | 1.33 | 4.29E-01 | 0.81  |
| Miscellaneous                           | Diet related               | beta-Sitosterol                                               | 1.02 | 1.07 | 7.38E-01 | 3.06E-01 | 0.34  | 1.04  | 0.90 | 0.64 | 1.12 | 5.48E-01 | 0.61  |
|                                         | Diet related               | Canthaxanthin                                                 | 0.89 | 0.96 | 1.84E-01 | 6.07E-01 | -1.35 | -0.52 | 0.55 | 0.86 | 0.72 | 5.01E-01 | -0.69 |
|                                         | Diet related               | Cryptoxanthin                                                 | 1.05 | 1.00 | 5.92E-01 | 9.95E-01 | 0.54  | -0.01 | 0.82 | 1.00 | 0.68 | 3.05E-01 | -1.06 |
|                                         | Diet related               | Quinic acid (add. Chlorogenic acid (CGA))                     | 1.06 | 0.91 | 3.27E-01 | 1.81E-01 | 1.00  | -1.37 | 0.63 | 0.52 | 0.35 | 2.16E-01 | -1.29 |
|                                         | Miscellaneous              | 4-Deoxythreonic acid                                          | 1.00 | 0.99 | 9.98E-01 | 8.77E-01 | 0.00  | -0.16 | 1.00 | 0.96 | 1.64 | 1.12E-01 | 1.68  |
|                                         | Miscellaneous              | Benzoic acid                                                  | 1.12 | 0.90 | 3.94E-01 | 4.56E-01 | 0.86  | -0.75 | 0.66 | 0.79 | 1.32 | 3.06E-01 | 1.06  |
|                                         | Miscellaneous              | Glycolate                                                     | 1.04 | 1.00 | 4.91E-01 | 9.46E-01 | 0.70  | -0.07 | 0.77 | 1.00 | 1.02 | 7.87E-01 | 0.27  |
|                                         | Miscellaneous              | Hippuric acid                                                 | 0.98 | 0.96 | 7.57E-01 | 5.02E-01 | -0.31 | -0.68 | 0.92 | 0.79 | 0.59 | 1.72E-01 | -1.43 |
|                                         | Miscellaneous              | Phosphate (inorganic and from organic phosphates)             | 1.02 | 1.00 | 3.03E-01 | 9.60E-01 | 1.04  | -0.05 | 0.63 | 1.00 | 1.02 | 8.40E-01 | 0.21  |
| Nucleobases and related                 | Pyrimidine metabolism      | Pseudouridine                                                 | 1.04 | 1.04 | 3.64E-01 | 2.99E-01 | 0.92  | 1.05  | 0.65 | 0.64 | 0.99 | 8.97E-01 | -0.13 |
| Vitamins, cofactors and related         | Acyl-carriers and related  | Pantothenic acid                                              | 1.02 | 1.08 | 6.67E-01 | 5.76E-02 | 0.43  | 1.96  | 0.84 | 0.24 | 1.00 | 9.94E-01 | -0.01 |
|                                         | Amino-carriers and related | 4-Pyridoxic acid                                              | 0.95 | 0.93 | 2.13E-01 | 7.85E-02 | -1.27 | -1.81 | 0.59 | 0.30 | 0.86 | 6.53E-01 | -0.46 |
|                                         | Carotenoids                | beta-Carotene                                                 | 1.00 | 0.99 | 9.24E-01 | 8.89E-01 | -0.10 | -0.14 | 0.96 | 0.97 | 0.62 | 1.11E-01 | -1.69 |
|                                         | Redox-carrier and related  | Coenzyme Q10                                                  | 0.98 | 1.04 | 7.16E-01 | 5.01E-01 | -0.37 | 0.68  | 0.89 | 0.79 | 1.23 | 3.41E-01 | 0.98  |

|  |                         |                  |      |      |          |          |       |      |      |      |      |          |      |
|--|-------------------------|------------------|------|------|----------|----------|-------|------|------|------|------|----------|------|
|  | Tocopherols and related | alpha-Tocopherol | 1.00 | 1.02 | 9.75E-01 | 3.95E-01 | -0.03 | 0.86 | 0.98 | 0.75 | 1.08 | 4.08E-01 | 0.85 |
|--|-------------------------|------------------|------|------|----------|----------|-------|------|------|------|------|----------|------|
